# Supplementary material for: Novel Dimethylmethylene‐Bridged Triphenylamine‐PDI Acceptor for Bulk‐Heterojunction Organic Solar Cells
Source: PubMed Central journal article supplement (PMC5644237; doi:10.1002/advs.201700110), 2017-06-22
Supplement: ADVS-4-na-s001.pdf [file ADVS-4-na-s001.pdf]

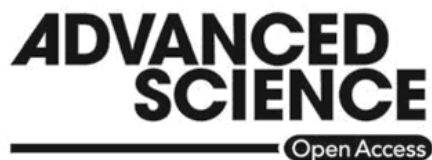

## Supporting Information

for *Adv. Sci.*, DOI: 10.1002/advs.201700110

Novel Dimethylmethylene-Bridged Triphenylamine-PDI  
Acceptor for Bulk-Heterojunction Organic Solar Cells

*Yu Xiong, Bo Wu, Xiaoyan Zheng, Zheng Zhao, Ping Deng,  
Ming Lin, Benzhong Tang, and Beng S. Ong\**

## Supporting Information

### Novel Dimethylmethylen-bridged Triphenylamine-PDI Acceptor for Bulk-heterojunction Organic Solar Cells

*Yu Xiong, Bo Wu, Xiaoyan Zheng, Zheng Zhao, Ping Deng, Ming Lin, Benzhong Tang and Beng S. Ong\**

Dr. Y. Xiong, Dr. B. Wu, Dr. P. Deng, Prof. B. S. Ong  
Research Centre of Excellence, Institute of Creativity and Department of Chemistry,  
Hong Kong Baptist University, Hong Kong, SAR, China.  
E-mail: bong@hkbu.edu.hk

Dr. Y. Xiong, Dr. Z. Zhao, Prof. B. Tang  
HKUST Shenzhen Research Institute, No.9 Yuexing 1st RD, Hi-tech Park, Nanshan,  
Shenzhen 518057, P.R. China

Dr. X. Zheng, Dr. Z. Zhao, Prof. B. Tang  
Department of Chemistry, The Hong Kong University of Science and Technology,  
Clear Water Bay, Hong Kong, SAR, China

Dr. M. Lin  
Institute of Materials Research and Engineering, Agency for Science, Technology and  
Research, 2 Fusionopolis Way, Innovis138634, Singapore

**Materials and Instruments:** All chemicals were purchased from commercial suppliers unless otherwise noted and used without further purification. All reactions were performed under a nitrogen atmosphere. Diethyl ether, tetrahydrofuran and toluene were distilled from sodium benzophenone. Intermediate PDI-CC was synthesized according to the reported procedures,<sup>[1]</sup> and DMTPA-3I was synthesized with slight modification to the reported method.<sup>[2]</sup>

Nuclear magnetic resonance (NMR) spectra were recorded on a Bruker Ultrashield 400 Plus NMR spectrometer. Thermogravimetric analyses (TGA) were conducted on a TA Instruments Q5000IR at a heating rate of 20 °C min<sup>-1</sup> under nitrogen gas flow. UV-vis spectra were recorded on a PerkinElmer Lambda 20 UV-vis spectrophotometer. Cyclic voltammetry (CV) measurements were carried out in a deoxygenated anhydrous acetonitrile solution on a CHI600 electrochemical workstation. Pt disk was used as the working electrode, Ag/AgNO<sub>3</sub> as the reference electrode, Pt wire as the counter electrode, and 0.1 M tetrabutylammonium hexafluorophosphate as the supporting electrolyte, and the measurements were calibrated with ferrocene (Fc) as the internal standard. AFM measurements were performed by using a Scanning Probe Microscope Dimension 3100 in tapping mode. All film samples were spin-casted onto ITO/ZnO substrates. XRD was carried out on a Bruker D8 Discovery with General Area Detector Diffraction System with a Cu K $\alpha$  radiation excited at 40 kV and 40 mA. The incoming X-ray was scanned at the grazing angle between 0.5-2.5 degree.

***Theoretical Calculation:*** Theoretical calculations for DMTPA-PDI<sub>3</sub> were performed by Gaussian 09 program<sup>[3]</sup> using Density Functional Theory (DFT). To simplify computations and enhance computational efficiency, the N-hexylheptyl group of DMTPA-PDI<sub>3</sub> was replaced with a simple N-methyl group, and geometric structural optimization was performed at the B3LYP/6-31G\* level, yielding optimized geometric structures to obtain the corresponding electron density.

**Hole- and Electron-only Devices:** The electron and hole mobilities were evaluated using space charge limited current (SCLC) method using electron- and hole-only devices with respective device architectures of ITO/PEDOT:PSS/PTB7-Th:DMTPA-PDI<sub>3</sub> (140 nm) /MoO<sub>3</sub>/Ag and ITO/ZnO/PTB7-Th:DMTPA-PDI<sub>3</sub> (140 nm)/ZnO/Ag. The current-voltage curves were obtained and fitted to a space charge limited form described by:

$$J = (8/9) \epsilon_r \epsilon_0 \mu (V^2/L^3) \quad (1)$$

where  $\epsilon_0$  is the permittivity of free space,  $\epsilon_r$  is the relative permittivity of the material,  $\mu$  is the electron mobility,  $V$  is the voltage drop across the device and  $L$  is the thickness of the film. For most polymers,  $\epsilon_r$  is around 3.

**Figure S1.** TGA plot of DMTPA-PDI<sub>3</sub> at a heating rate of 20 °C min<sup>-1</sup> under N<sub>2</sub> atmosphere.

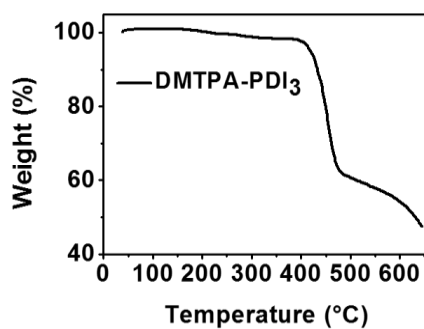

**Figure S2.** X-ray diffraction pattern of active layer PTB7-Th:DMTPA-PDI<sub>3</sub> (1.5:1 weight ratio, 3% CN).

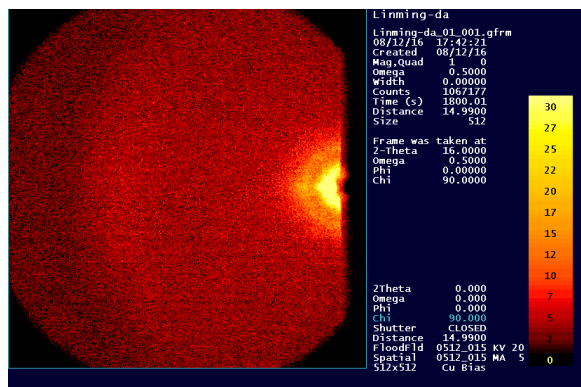

**Figure S3.** X-ray diffraction pattern of acceptor DMTPA-PDI<sub>3</sub>.

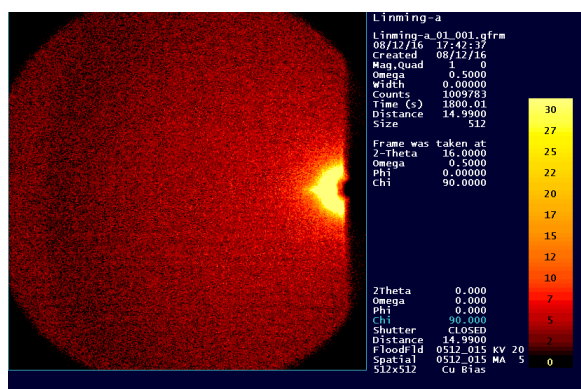

**Figure S4.** X-ray diffraction pattern of donor PTB7-Th.

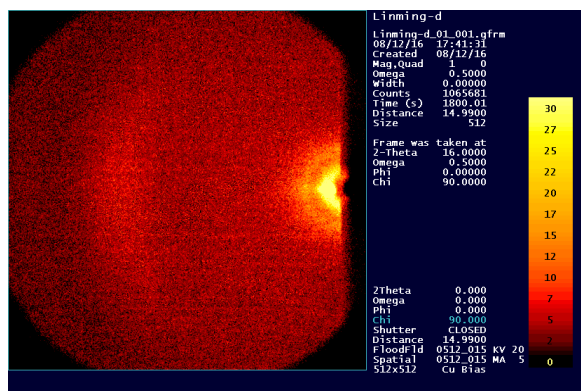

**Figure S5.**  $J_{1/2}$ - $V$  characteristics of the hole and electron-only devices

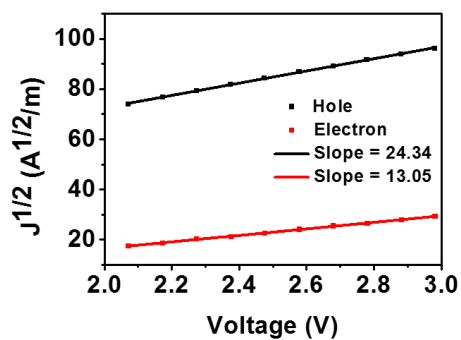

**Figure S6.** <sup>1</sup>H NMR of compound DMTPA-PDI<sub>3</sub>

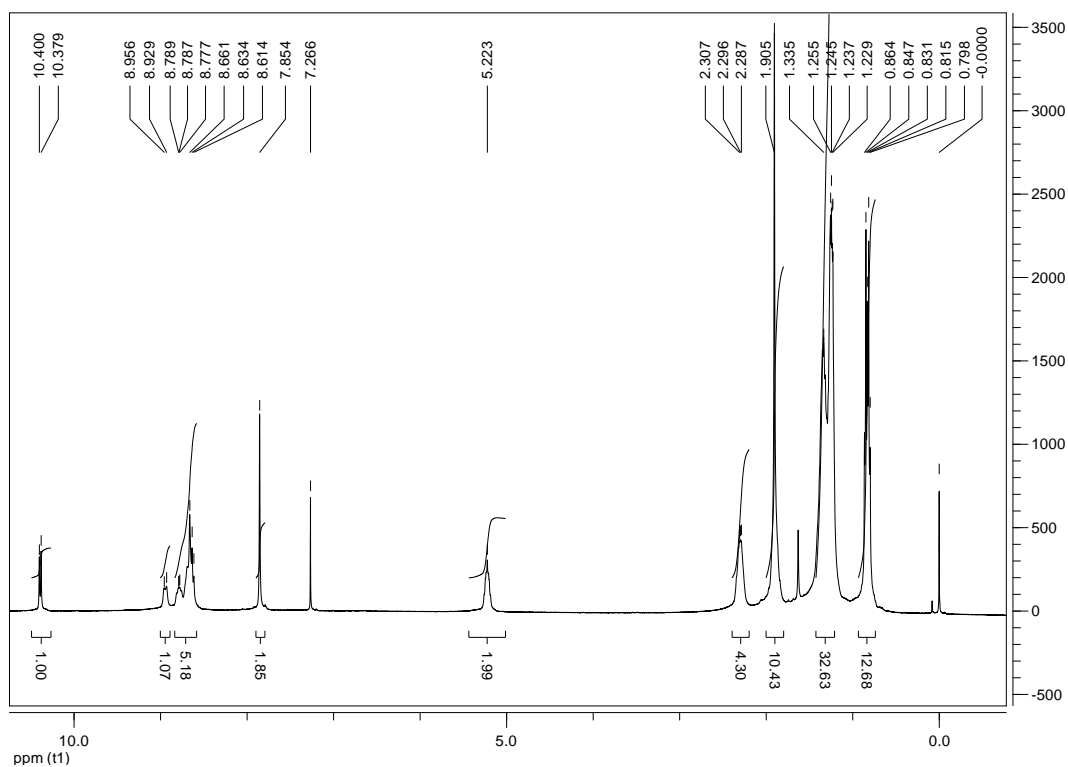

**Figure S7.**  $^{13}\text{C}$  NMR of compound **DMTPA-PDI<sub>3</sub>**

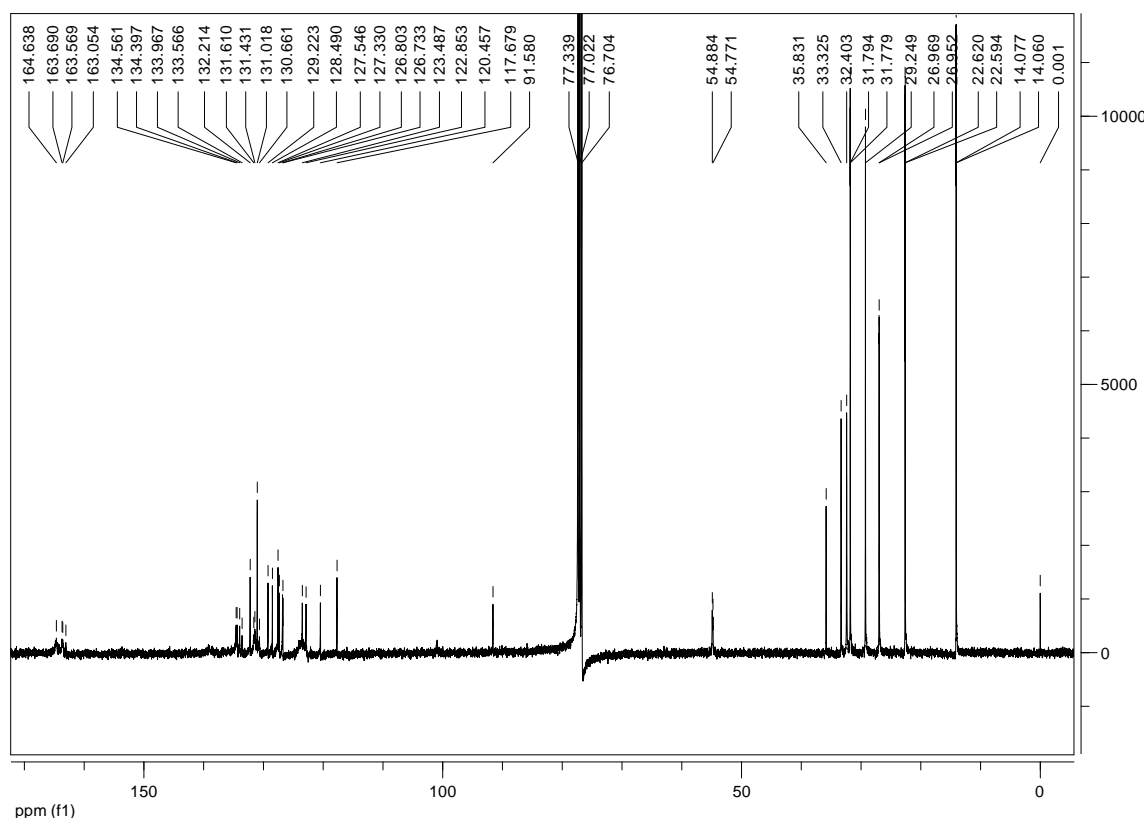

**Figure S8.** HR-MS (MALDI-TOF) mass spectrum of **DMTPA-PDI<sub>3</sub>**

**HONG KONG BAPTIST UNIVERSITY, DEPARTMENT OF CHEMISTRY (MALDI-TOF)**

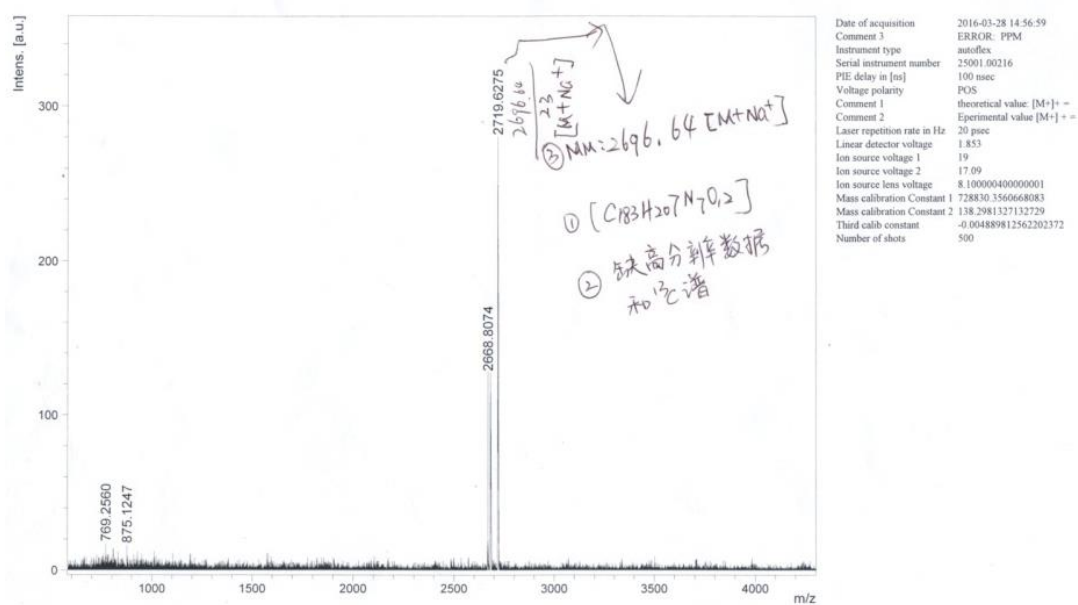

Date of acquisition: 2016-03-28 14:56:59  
 Comment 3: ERROR: PPM  
 Instrument type: autoflex  
 Serial instrument number: 25001.00216  
 PIE delay in [ns]: 100  
 Voltage polarity: POS  
 Comment 1: theoretical value:  $[\text{M}]^+ -$   
 Comment 2: Experimental value:  $[\text{M}]^+ +$   
 Laser repetition rate in Hz: 20  
 Laser detector voltage: 1.853  
 Ion source voltage 1: 19  
 Ion source voltage 2: 17.09  
 Ion source lens voltage: 8.100000400000001  
 Mass calibration Constant 1: 728830.3560668083  
 Mass calibration Constant 2: 138.2981327132729  
 Third calib constant: -0.004889812562202372  
 Number of shots: 500

## References

- [1] Q. Yan, D. Zhao, *Org. Lett.* **2009**, *11*, 3426.
- [2] Z. Fang, V. Chellappan, R. D. Webster, L. Ke, T. Zhang, B. Liu, Y-H. Lai, *J. Mater. Chem.* **2012**, *22*, 15397.
- [3] M. J. Frisch, G. W. Trucks, H. B. Schlegel, G. E. Scuseria, M. A. Robb, J. R. Cheeseman, G. Scalmani, V. Barone, B. Mennucci, G. A. Petersson, H. Nakatsuji, M. L. Caricato, X.; , H. P. Hratchian, A. F. Izmaylov, J. Bloino, G. Zheng, J. L. Sonnenberg, M. Hada, M. Ehara, K. Toyota, R. Fukuda, J. Hasegawa, M. Ishida, T. Nakajima, Y. Honda, O. Kitao, H. Nakai, T. Vreven, J. Montgomery, J. A.; , J. E. Peralta, F. Ogliaro, M. Bearpark, J. J. Heyd, E. Brothers, K. N. Kudin, V. N. Staroverov, R. Kobayashi, J. Normand, K. Raghavachari, A. Rendell, J. C. Burant, S. S. Iyengar, J. Tomasi, M. Cossi, N. Rega, N. J. Millam, M. Klene, J. E. Knox, J. B. Cross, V. Bakken, C. Adamo, J. Jaramillo, R. Gomperts, R. E. Stratmann, O. Yazyev, A. J. Austin, R. Cammi, C. Pomelli, J. W. Ochterski, R. L. Martin, K. Morokuma, V. G. Zakrzewski, G. A. Voth, P. Salvador, J. J. Dannenberg, S. Dapprich, A. D. Daniels, Ö. Farkas, J. B. Foresman, J. V. Ortiz, J. Cioslowski, D. J. Fox, *Gaussian, Inc.*, Wallingford CT, **2009**.
